# Supplementary material
Source: PubMed Central journal article supplement (PMC3038336)
Supplement: supp_ehq438_ehq438supp_table.pdf [file supp_ehq438_ehq438supp_table.pdf]

## ONLINE SUPPLEMENT

**Table A1.** Hazard ratios (95% CI) for the relation between the co-variables and risk of CVD events and all cause mortality.

| Exposure                      | CVD events<br>HR <sup>†</sup> (95% CI) | All cause mortality<br>HR <sup>†</sup> (95% CI) |
|-------------------------------|----------------------------------------|-------------------------------------------------|
| <b>Psychological distress</b> |                                        |                                                 |
| GHQ-12 =0                     | 1.00 (ref)                             | 1.00 (ref)                                      |
| GHQ-12 = 1 – 3                | 1.32 (1.17 – 1.50)                     | 1.32 (1.16 – 1.51)                              |
| GHQ-12 ≥ 4                    | 1.48 (1.29 – 1.70)                     | 1.48 (1.28 – 1.72)                              |
| <b>Psychiatric admission</b>  |                                        |                                                 |
| Never                         | 1.00 (ref)                             | 1.00 (ref)                                      |
| Once                          | 1.34 (0.99 – 1.81)                     | 1.89 (1.45 – 2.47)                              |
| Two or more                   | 1.62 (1.16 – 2.25)                     | 2.51 (1.90 – 3.32)                              |
| <b>Socioeconomic group</b>    |                                        |                                                 |
| Professional                  | 1.00 (ref)                             | 1.00 (ref)                                      |
| Part skilled/unskilled        | 1.38 (1.19 – 1.60)                     | 1.31 (1.11 – 1.53)                              |
| <b>Marital status</b>         |                                        |                                                 |
| Married/ partnered            | 1.00 (ref)                             | 1.00 (ref)                                      |
| Single/separated/widowed      | 1.08 (0.97 – 1.21)                     | 1.39 (1.23 – 1.56)                              |
| <b>Smoking</b>                |                                        |                                                 |
| Never                         | 1.00 (ref)                             | 1.00 (ref)                                      |
| Previous                      | 1.25 (1.09 – 1.43)                     | 1.40 (1.19 – 1.63)                              |
| Current                       | 2.00 (1.75 – 2.28)                     | 2.42 (2.08 – 2.81)                              |
| <b>Physical activity</b>      |                                        |                                                 |
| Bottom tertile                | 1.00 (ref)                             | 1.00 (ref)                                      |
| Middle tertile                | 0.94 (0.82 – 1.06)                     | 0.79 (0.69 – 0.91)                              |
| Upper tertile                 | 0.76 (0.66 – 0.87)                     | 0.67 (0.58 – 0.79)                              |
| <b>Alcohol</b>                |                                        |                                                 |
| Never/ex-drinker              | 1.16 (1.03 – 1.31)                     | 1.02 (0.90 – 1.17)                              |
| Moderate                      | 1.00 (ref)                             | 1.00 (ref)                                      |
| Heavy                         | 0.77 (0.65 – 0.90)                     | 1.09 (0.92 – 1.28)                              |
| <b>Hypertension</b>           |                                        |                                                 |
| No                            | 1.00 (ref)                             | 1.00 (ref)                                      |
| Yes                           | 1.46 (1.29 – 1.65)                     | 1.23 (1.08 – 1.40)                              |

<sup>†</sup>Hazard ratios (HR) are mutually adjusted for all presented variables, plus age and sex.
